# Supplementary material
Source: Royal Society of Chemistry journal article supplement (doi:10.1039/d6ta02520j)
Supplement: d6ta02520j1.pdf [file d6ta02520j1.pdf]

## Supporting Information

# Hierarchical Interfacial Engineering of SiO<sub>2</sub>@Graphite/Co Hybrids: Synergistic Dielectric-Magnetic Loss and Superior Microwave Absorption

Jingyan Tang <sup>a</sup>, Qingguo Xue <sup>a</sup>, Jingsong Wang <sup>a, \*</sup>

<sup>a</sup> State Key Laboratory of Advanced Metallurgy, University of Science and Technology  
Beijing, Beijing 100083, China

\*Corresponding author.

Email address: wangjingsong@ustb.edu.cn (J.S. Wang)

## Electromagnetic absorbing performance calculation

The impedance matching ( $Z_{in}/Z_0$ ) can be calculated using Equations (S1):

$$Z_{in} = |Z_{in}/Z_0| = \left| (\mu_r/\epsilon_r)^{1/2} \tanh \left[ j(2\pi f d/c)(\mu_r \epsilon_r)^{1/2} \right] \right| \quad (S1)$$

The attenuation constant ( $\alpha$ ) can be calculated using Equations (S2):

$$\alpha = \frac{\sqrt{2f\pi}}{c} \times \sqrt{(\epsilon''\mu'' - \epsilon'\mu') + \sqrt{(\epsilon''\mu'' - \epsilon'\mu')^2 + (\epsilon'\mu'' + \epsilon''\mu')^2}} \quad (S2)$$

**Figure**

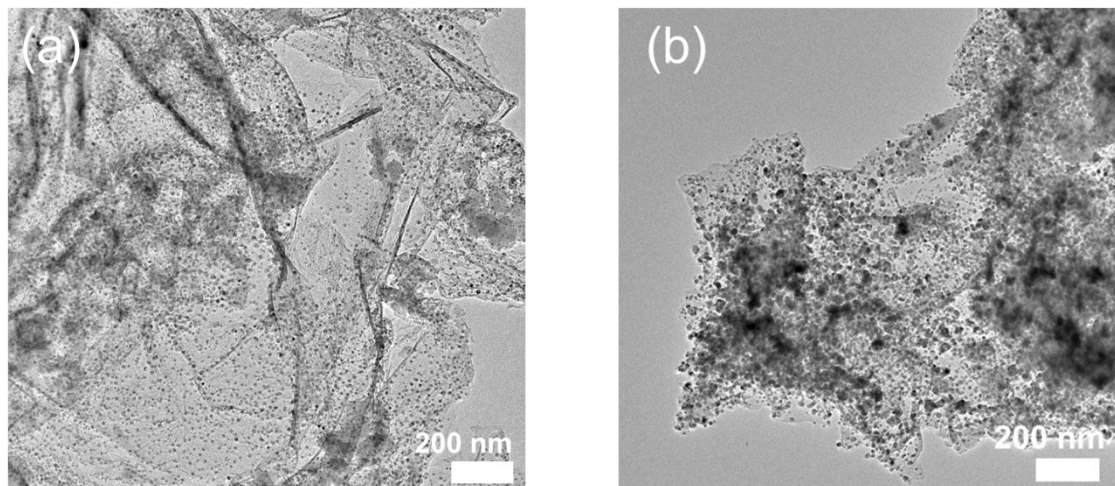

**Figure S1** (a) TEM images of  $\text{SiO}_2@\text{Gr}/\text{Co}-10$ ; and (b) TEM images of  $\text{SiO}_2@\text{Gr}/\text{Co}-15$ .

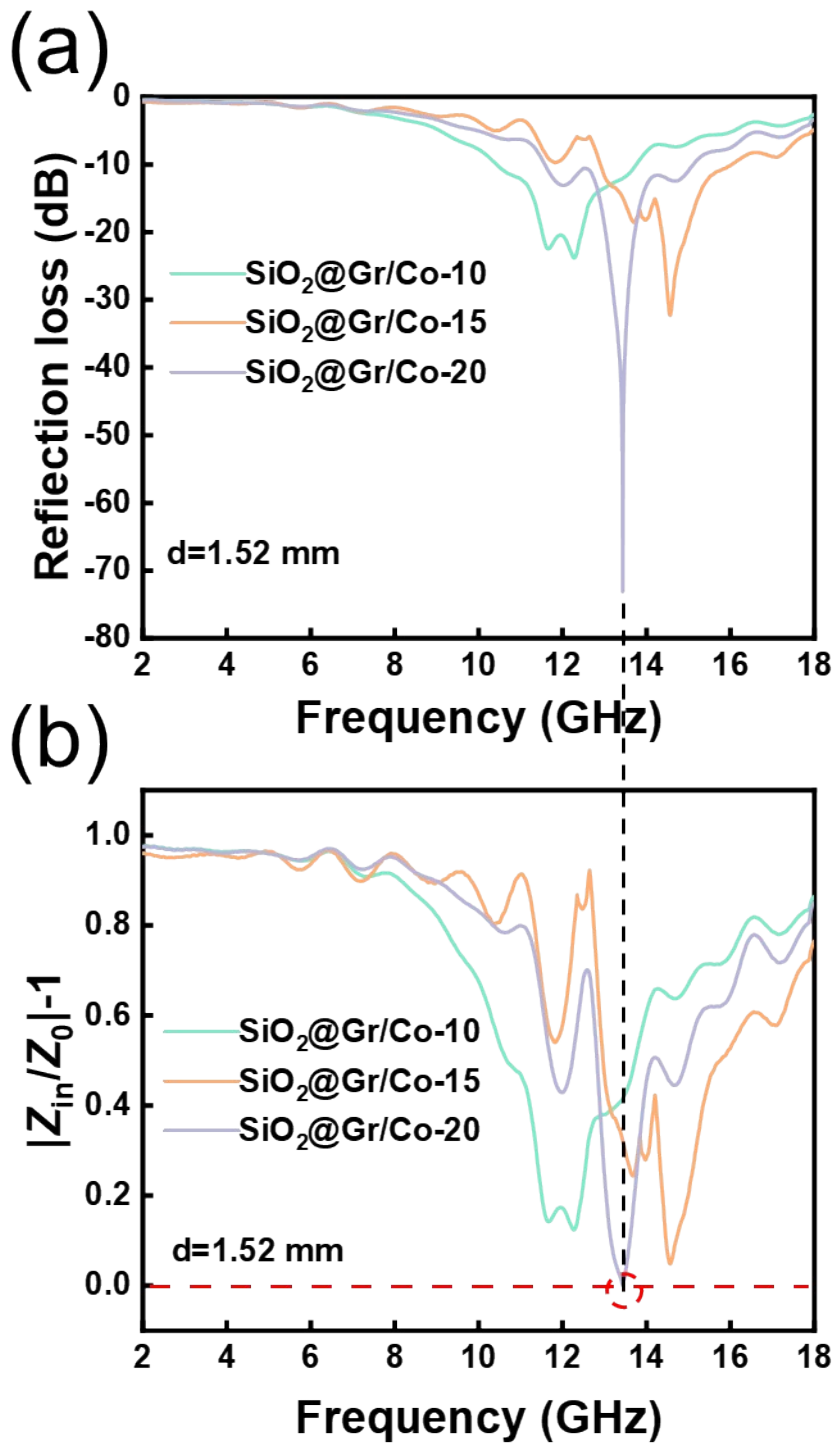

**Figure S2** (a)-(b) corresponding impedance matching curves for SiO<sub>2</sub>@Gr/Co-10, SiO<sub>2</sub>@Gr/Co-15 and SiO<sub>2</sub>@Gr/Co-20 at the same thickness.

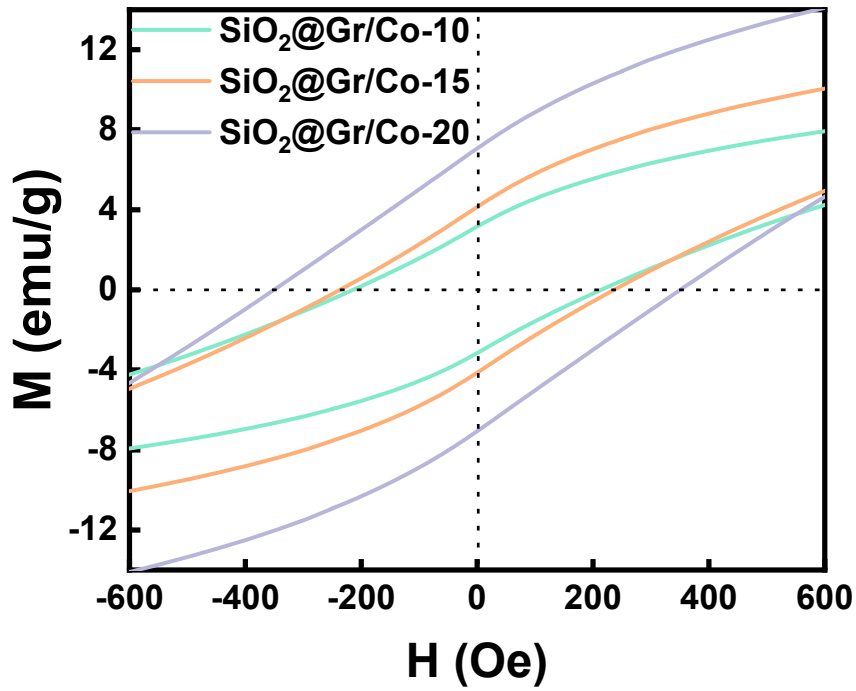

Figure S3 Magnetic hysteresis loops of SiO<sub>2</sub>@Gr/Co-10, SiO<sub>2</sub>@Gr/Co-15 and SiO<sub>2</sub>@Gr/Co-20.

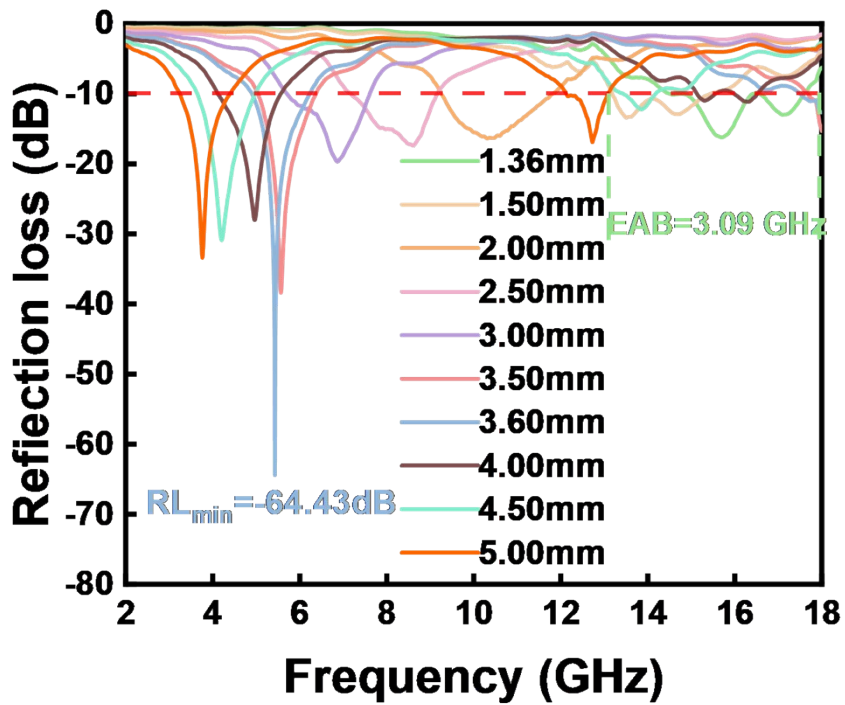

Figure S4 RL curves of SiO<sub>2</sub>@Gr-OolyCo.

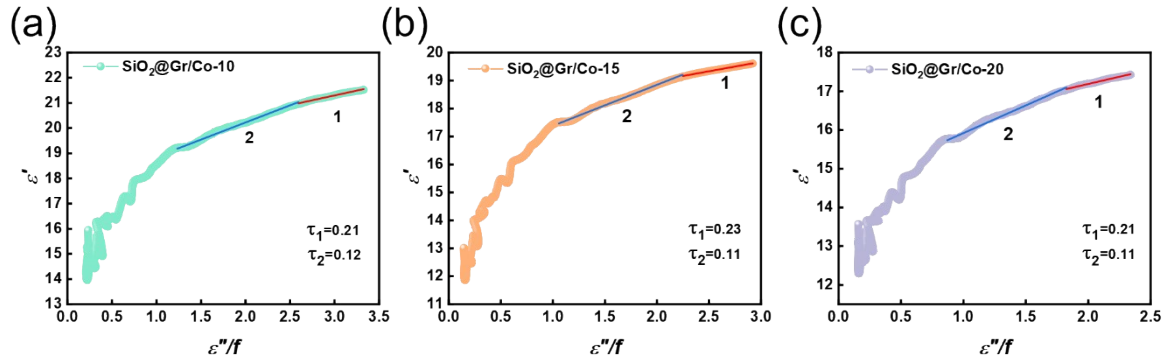

**Figure S5** The relationship between  $\epsilon''$  and  $\epsilon'/f$  of (a) SiO<sub>2</sub>@Gr/Co-10, (b) SiO<sub>2</sub>@Gr/Co-15, and (c) SiO<sub>2</sub>@Gr/Co-20.

**Table S1** Comparison of EMW absorption performance with the recently reported EMW absorption materials of similar compositions.

| Sample                                                          | Filling ratio (wt%) | Thickness (mm) | RLmin (dB) | Thickness (mm) | EAB (GHz) | Refs.     |
|-----------------------------------------------------------------|---------------------|----------------|------------|----------------|-----------|-----------|
| CoC@CoFe/C@PPy                                                  | 25                  | 1.69           | -64.32     | 1.88           | 5.38      | [1]       |
| Co-2DSiO <sub>2</sub>                                           | 30                  | 2.5            | -51.6      | 2.5            | 4.6       | [2]       |
| (ZrO <sub>2</sub> -SiO <sub>2</sub> )f/ZrB <sub>2</sub> -SiOC   | /                   | 2.9            | -59.34     | 2.9            | 4.2       | [3]       |
| Ti <sub>3</sub> C <sub>2</sub> Tx@C-Co@SiO <sub>2</sub>         | 30                  | 1.8            | -51.8      | 1.4            | 3.9       | [4]       |
| Co-Fe@C/SiO <sub>2</sub>                                        | 30                  | 1.43           | -59.6      | 1.43           | 4.6       | [5]       |
| CCM7                                                            | 20                  | 2.5            | -61.42     | 2.5            | 4.1       | [6]       |
| CMC2                                                            | /                   | 3.9            | -39.6      | 1.4            | 3.76      | [7]       |
| Co@SiO <sub>2</sub> @PPy                                        | 50                  | 1.83           | -50.70     | 1.83           | 5.4       | [8]       |
| FCNWs-3                                                         | /                   | 4.9            | -47.6      | 5.5            | 4.0       | [9]       |
| SiO <sub>2</sub> @Ti <sub>3</sub> C <sub>2</sub> T <sub>x</sub> | 60                  | 1.3            | -58.01     | 1.3            | 3.44      | [10]      |
| PCN/SiO <sub>2</sub> @MXene/Fe <sub>3</sub> C                   | 40                  | 2.03           | -71.14     | 2.03           | 3.85      | [11]      |
| SiO <sub>2</sub> @Gr/Co-20                                      | 50                  | 1.52           | -73.12     | 1.34           | 4.02      | This work |

## References

- [1] Z. Jiao, J. Hu, M. Ma, Y. Liu, J. Zhao, X. Wang, S. Luan and L. Zhang, *Journal of Colloid and Interface Science*, 2023, **650**, 2014–2023.
- [2] Z. Hao, J. Zhou, D. Liu, Z. Zhang, T. Zhang, J. Sun, J. Xu, N. Yang and H. Wu, *Chem. Eng. J.*, 2023, **473**, 145296.
- [3] Y. Deng, B. Ren, Y. Jia, Q. Wang and H. Li, *J. Mater. Sci. Technol.*, 2024, **196**, 51–59.
- [4] T. Li, M. Qiao, F. Chen, P. Chen and X. Li, *Carbon*, 2026, **250**, 121286.
- [5] Z. Zhang, Y. Zhao, Z. Li, L. Zhang, Z. Liu, Z. Long, Y. Li, Y. Liu, R. Fan, K. Sun and Z. Zhang, *Adv. Compos. Hybrid Mater.*, 2022, **5**, 513–524.

- [6] J.-Z. Chen, P.-P. Chen, B.-Y. Lei, Y.-L. Hou, Z.-A. Li, J.-T. Lei and D.-L. Zhao, *Carbon*, 2024, **230**, 119628.
- [7] Y. Hu, D. Ni, B. Chen, F. Cai, X. Wang, Y. Kan, Y. Ding and S. Dong, *Composites, Part B*, 2025, **304**, 112668.
- [8] P. Tang, X. Zhao, J. Du, M. Li, H. Qian, H. Ren, X. Zhang, G. Wu and X. Wang, *Appl. Surf. Sci.*, 2024, **660**, 159977.
- [9] P. Yang, W. Deng, H. Ruan, Z. Qu, R. Li, L. Wang, J. Luo, Z. Zhou, M. Shou, X. Huang, Q. Chen and X. Gong, *Chem. Eng. J.*, 2024, **492**, 152253.
- [10] H. Niu, X. Tu, S. Zhang, Y. Li, H. Wang, G. Shao, R. Zhang, H. Li, B. Zhao and B. Fan, *Chem. Eng. J.*, 2022, **446**, 137260.
- [11] J. Huang, X. Zeng, X. Jiang, X. Deng, Q. Fu, Y. Xie and Y. Gao, *Chem. Eng. J.*, 2025, **503**, 158520.
